# Supplementary material
Source: PubMed Central journal article supplement (PMC3102761)
Supplement: NIHMS272943-supplement-Supp1.pdf [file NIHMS272943-supplement-Supp1.pdf]

**SUPPLEMENTAL MATERIAL**

**Supplemental Table 1.** Correlation matrix for phenotype data.

|                      |               | Absolute BP response |           |               | Percent BP response |           |               |
|----------------------|---------------|----------------------|-----------|---------------|---------------------|-----------|---------------|
|                      |               | Systolic             | Diastolic | Mean arterial | Systolic            | Diastolic | Mean arterial |
| Absolute BP Response | Systolic      | 1.00                 | 0.53      | 0.80          | 0.99                | 0.49      | 0.78          |
|                      | Diastolic     | ...                  | 1.00      | 0.93          | 0.53                | 0.99      | 0.93          |
|                      | Mean Arterial | ...                  | ...       | 1.00          | 0.80                | 0.91      | 0.99          |
| Percent BP Response  | Systolic      | ...                  | ...       | ...           | 1.00                | 0.50      | 0.79          |
|                      | Diastolic     | ...                  | ...       | ...           | ...                 | 1.00      | 0.93          |
|                      | Mean Arterial | ...                  | ...       | ...           | ...                 | ...       | 1.00          |

BP=Blood pressure

All Pearson correlation coefficients were highly statistically significant ( $p < 0.0001$ ).

**Supplemental Table 2.** SNP Characteristics.

| Gene                                    | SNP        | Chromosome | Physical Location (bp) | Alleles (Major/Minor) | Minor Allele Frequency (%) | HW* P-Value | Genotyping Call Rate (%) | P-Value <sup>†</sup> | P-Value <sup>‡</sup> |
|-----------------------------------------|------------|------------|------------------------|-----------------------|----------------------------|-------------|--------------------------|----------------------|----------------------|
| Angiotensin II, type 1 receptor (AGTR1) | rs409742   | 3          | 149895055              | T/C                   | 14.7                       | 0.93        | 100.0                    | 0.49                 | 0.51                 |
|                                         | rs275651   | 3          | 149897577              | T/A                   | 14.7                       | 0.78        | 98.8                     | 0.54                 | 0.56                 |
|                                         | rs275652   | 3          | 149897674              | A/C                   | 14.9                       | 0.66        | 96.0                     | 0.72                 | 0.79                 |
|                                         | rs1492078  | 3          | 149897867              | G/A                   | 19.7                       | 0.52        | 96.7                     | 0.16                 | 0.18                 |
|                                         | rs2933249  | 3          | 149899210              | G/A                   | 13.1                       | 0.61        | 99.9                     | 0.73                 | 0.74                 |
|                                         | rs2131127  | 3          | 149906833              | G/A                   | 37.1                       | 0.84        | 99.5                     | 0.17                 | 0.20                 |
|                                         | rs12695877 | 3          | 149909724              | T/C                   | 36.8                       | 0.88        | 99.9                     | 0.23                 | 0.26                 |
|                                         | rs2638360  | 3          | 149911046              | T/C                   | 10.6                       | 0.43        | 93.8                     | 0.66                 | 0.69                 |
|                                         | rs931490   | 3          | 149913457              | A/G                   | 10.9                       | 0.64        | 96.6                     | 0.84                 | 0.87                 |
|                                         | rs4681440  | 3          | 149914722              | C/T                   | 5.0                        | 0.81        | 100.0                    | 0.05                 | 0.05                 |
|                                         | rs4681443  | 3          | 149915159              | G/A                   | 5.0                        | 1.00        | 99.9                     | 0.04                 | 0.04                 |
|                                         | rs4681444  | 3          | 149915264              | T/G                   | 5.1                        | 1.00        | 99.5                     | 0.05                 | 0.05                 |
|                                         | rs1492103  | 3          | 149915654              | A/G                   | 10.7                       | 0.72        | 100.0                    | 0.69                 | 0.66                 |
|                                         | rs718858   | 3          | 149918202              | C/T                   | 4.9                        | 0.53        | 89.9                     | 0.04                 | 0.03                 |
|                                         | rs1492100  | 3          | 149920117              | A/T                   | 10.0                       | 0.44        | 99.9                     | 0.03                 | 0.04                 |
|                                         | rs3772616  | 3          | 149920881              | G/A                   | 16.9                       | 0.19        | 99.9                     | 0.55                 | 0.48                 |
|                                         | rs4524238  | 3          | 149922478              | C/T                   | 9.9                        | 0.30        | 99.9                     | 0.04                 | 0.06                 |
|                                         | rs16860760 | 3          | 149927327              | C/T                   | 7.0                        | 0.21        | 99.8                     | 0.003                | 0.004                |
|                                         | rs389566   | 3          | 149929072              | T/A                   | 19.5                       | 0.28        | 96.5                     | 0.09                 | 0.08                 |
|                                         | rs3772608  | 3          | 149937364              | C/T                   | 4.8                        | 0.16        | 95.9                     | 0.05                 | 0.06                 |
|                                         | rs6801836  | 3          | 149938227              | T/C                   | 14.2                       | 0.65        | 96.6                     | 0.59                 | 0.55                 |
|                                         | rs1800766  | 3          | 149940332              | T/C                   | 20.6                       | 0.48        | 99.8                     | 0.09                 | 0.08                 |
|                                         | rs5186     | 3          | 149942678              | A/C                   | 5.7                        | 0.39        | 97.6                     | 0.03                 | 0.03                 |
|                                         | rs275646   | 3          | 149946212              | C/T                   | 9.8                        | 0.12        | 100.0                    | 0.33                 | 0.38                 |
|                                         | rs275645   | 3          | 149947144              | A/G                   | 20.6                       | 0.43        | 97.0                     | 0.94                 | 0.88                 |
|                                         | rs275642   | 3          | 149948381              | A/G                   | 10.1                       | 0.44        | 99.8                     | 0.34                 | 0.39                 |

Supplemental Table 2 (con't)

| Gene                                                    | SNP                         | Chromosome | Physical Location (bp) | Alleles (Major/Minor) | Minor Allele Frequency (%) | HW* P-Value | Genotyping Call Rate (%) | P-Value <sup>†</sup> | P-Value <sup>‡</sup> |
|---------------------------------------------------------|-----------------------------|------------|------------------------|-----------------------|----------------------------|-------------|--------------------------|----------------------|----------------------|
| Purinergic receptor P2Y, G-protein coupled, 12 (P2RY12) | rs9820422                   | 3          | 152546953              | G/A                   | 18.6                       | 0.82        | 100.0                    | 0.40                 | 0.40                 |
|                                                         | rs6793061                   | 3          | 152562650              | A/C                   | 16.1                       | 0.55        | 99.7                     | 0.11                 | 0.08                 |
|                                                         | rs1388622                   | 3          | 152567102              | G/A                   | 18.1                       | 0.82        | 100.0                    | 0.48                 | 0.49                 |
|                                                         | rs17283010                  | 3          | 152580081              | G/A                   | 14.6                       | 0.40        | 99.5                     | 0.03                 | 0.02                 |
| Interleukin 18 (IL18)                                   | rs544354                    | 11         | 111517840              | T/C                   | 35.4                       | 0.31        | 99.4                     | 0.78                 | 0.67                 |
|                                                         | rs5744280                   | 11         | 111521724              | G/A                   | 49.3                       | 0.10        | 99.9                     | 0.85                 | 0.75                 |
|                                                         | rs360729                    | 11         | 111522131              | A/T                   | 12.3                       | 0.05        | 100.0                    | 0.78                 | 0.73                 |
|                                                         | rs360722                    | 11         | 111531913              | T/C                   | 35.1                       | 0.19        | 100.0                    | 0.93                 | 0.80                 |
|                                                         | rs7106524                   | 11         | 111538846              | G/A                   | 49.2                       | 0.08        | 100.0                    | 0.72                 | 0.62                 |
|                                                         | rs360717                    | 11         | 111539935              | G/A                   | 11.8                       | 0.18        | 99.7                     | 0.90                 | 0.90                 |
|                                                         | rs360718                    | 11         | 111539949              | T/G                   | 11.8                       | 0.15        | 99.8                     | 0.72                 | 0.74                 |
|                                                         | Dopamine Receptor D2 (DRD2) | rs2234689  | 11                     | 112783693             | G/C                        | 3.9         | 0.11                     | 99.9                 | 0.07                 |
| rs1554929                                               |                             | 11         | 112783974              | C/T                   | 6.1                        | 0.84        | 99.8                     | 0.80                 | 0.79                 |
| rs1124492                                               |                             | 11         | 112787485              | G/T                   | 46.8                       | 0.93        | 100.0                    | 0.53                 | 0.58                 |
| rs1124493                                               |                             | 11         | 112787505              | G/T                   | 49.3                       | 0.75        | 100.0                    | 0.21                 | 0.29                 |
| rs12363125                                              |                             | 11         | 112791126              | C/T                   | 6.2                        | 0.84        | 100.0                    | 0.65                 | 0.63                 |
| rs1107162                                               |                             | 11         | 112794247              | G/A                   | 6.4                        | 0.44        | 97.8                     | 0.28                 | 0.32                 |
| rs1079727                                               |                             | 11         | 112794392              | A/G                   | 45.1                       | 0.85        | 100.0                    | 0.12                 | 0.19                 |
| rs2002453                                               |                             | 11         | 112794508              | G/A                   | 48.6                       | 0.85        | 100.0                    | 0.08                 | 0.13                 |
| rs2245805                                               |                             | 11         | 112795909              | C/A                   | 48.5                       | 1.00        | 99.9                     | 0.07                 | 0.11                 |
| rs2734831                                               |                             | 11         | 112798806              | T/G                   | 6.1                        | 0.84        | 99.6                     | 0.76                 | 0.73                 |
| rs2471857                                               |                             | 11         | 112803549              | G/A                   | 45.5                       | 1.00        | 99.9                     | 0.11                 | 0.17                 |
| rs2471854                                               |                             | 11         | 112804849              | G/C                   | 45.5                       | 0.89        | 100.0                    | 0.10                 | 0.16                 |
| rs7131440                                               |                             | 11         | 112805120              | G/A                   | 6.1                        | 1.00        | 99.9                     | 0.51                 | 0.48                 |
| rs17115583                                              |                             | 11         | 112814112              | C/T                   | 41.5                       | 0.30        | 100.0                    | 0.19                 | 0.21                 |
| rs7125415                                               |                             | 11         | 112815891              | G/A                   | 39.8                       | 0.21        | 100.0                    | 0.17                 | 0.21                 |
| rs4648318                                               |                             | 11         | 112818599              | C/T                   | 43.5                       | 0.71        | 100.0                    | 0.12                 | 0.14                 |
| rs17529477                                              |                             | 11         | 112822277              | C/T                   | 3.8                        | 0.75        | 100.0                    | 0.11                 | 0.08                 |

Supplemental Table 2 (con't)

| Gene         | SNP                                     | Chromosome | Physical Location (bp) | Alleles (Major/Minor) | Minor Allele Frequency (%) | HW* P-Value | Genotyping Call Rate (%) | P-Value <sup>†</sup> | P-Value <sup>‡</sup> |      |
|--------------|-----------------------------------------|------------|------------------------|-----------------------|----------------------------|-------------|--------------------------|----------------------|----------------------|------|
| DRD2 (con't) | rs4245147                               | 11         | 112823217              | A/G                   | 16.3                       | 0.80        | 100.0                    | 0.04                 | 0.04                 |      |
|              | rs4936271                               | 11         | 112823915              | G/A                   | 16.2                       | 0.61        | 100.0                    | 0.05                 | 0.06                 |      |
|              | rs4581480                               | 11         | 112829684              | T/C                   | 12.7                       | 0.02        | 99.9                     | 0.20                 | 0.22                 |      |
|              | rs7122454                               | 11         | 112832678              | G/C                   | 38.9                       | 0.15        | 99.9                     | 0.61                 | 0.65                 |      |
|              | rs7131056                               | 11         | 112834984              | C/A                   | 41.8                       | 0.18        | 100.0                    | 0.44                 | 0.41                 |      |
|              | rs11214611                              | 11         | 112835429              | T/C                   | 39.5                       | 0.33        | 99.8                     | 0.45                 | 0.49                 |      |
|              | rs4936274                               | 11         | 112835661              | C/T                   | 9.5                        | 0.50        | 99.5                     | 0.23                 | 0.26                 |      |
|              | rs10891551                              | 11         | 112837505              | G/A                   | 39.3                       | 0.50        | 100.0                    | 0.54                 | 0.59                 |      |
|              | rs10891552                              | 11         | 112838881              | T/A                   | 36.9                       | 0.46        | 100.0                    | 0.90                 | 0.95                 |      |
|              | rs4630328                               | 11         | 112839419              | C/T                   | 3.5                        | 0.28        | 99.9                     | 0.06                 | 0.05                 |      |
|              | rs11601054                              | 11         | 112841382              | C/T                   | 3.5                        | 0.28        | 100.0                    | 0.06                 | 0.05                 |      |
|              | Nicotinamide N-methyltransferase (NNMT) | rs11600671 | 11                     | 113630534             | G/A                        | 15.9        | 0.55                     | 100.0                | 0.03                 | 0.05 |
|              |                                         | rs683271   | 11                     | 113634355             | A/G                        | 48.8        | 0.12                     | 99.8                 | 0.70                 | 0.60 |
|              |                                         | rs560931   | 11                     | 113636708             | C/T                        | 36.0        | 0.13                     | 100.0                | 0.46                 | 0.38 |
| rs611048     |                                         | 11         | 113636941              | A/T                   | 36.0                       | 0.13        | 100.0                    | 0.46                 | 0.38                 |      |
| rs10082585   |                                         | 11         | 113643284              | G/A                   | 38.4                       | 0.30        | 99.4                     | 0.31                 | 0.26                 |      |
| rs10891641   |                                         | 11         | 113644291              | G/A                   | 38.2                       | 0.22        | 99.8                     | 0.33                 | 0.27                 |      |
| rs17116793   |                                         | 11         | 113657848              | C/G                   | 38.5                       | 0.24        | 100.0                    | 0.38                 | 0.34                 |      |
| rs7115762    |                                         | 11         | 113658693              | C/A                   | 38.6                       | 0.26        | 99.5                     | 0.48                 | 0.44                 |      |
| rs4936293    |                                         | 11         | 113658715              | G/C                   | 39.3                       | 0.33        | 99.9                     | 0.26                 | 0.25                 |      |
| rs11214926   |                                         | 11         | 113659163              | G/A                   | 24.2                       | 0.85        | 100.0                    | 0.91                 | 0.93                 |      |
| rs4938087    |                                         | 11         | 113659975              | C/T                   | 7.0                        | 0.48        | 100.0                    | 0.08                 | 0.07                 |      |
| rs2244175    |                                         | 11         | 113667731              | A/G                   | 48.0                       | 0.52        | 98.8                     | 0.03                 | 0.02                 |      |
| rs2847492    |                                         | 11         | 113668981              | G/A                   | 33.8                       | 0.57        | 100.0                    | 0.78                 | 0.73                 |      |
| rs2852432    |                                         | 11         | 113669214              | C/T                   | 40.5                       | 0.25        | 100.0                    | 0.22                 | 0.18                 |      |
| rs4646335    |                                         | 11         | 113672152              | A/T                   | 43.2                       | 0.03        | 100.0                    | 0.08                 | 0.07                 |      |
| rs3819100    |                                         | 11         | 113672686              | C/T                   | 49.3                       | 0.27        | 100.0                    | 0.23                 | 0.27                 |      |
| rs2256292    | 11                                      | 113673149  | C/G                    | 37.8                  | 0.20                       | 99.9        | 0.80                     | 0.87                 |                      |      |

Supplemental Table 2 (con't)

| Gene                                                                 | SNP        | Chromosome | Physical Location (bp) | Alleles (Major/Minor) | Minor Allele Frequency (%) | HW* P-Value | Genotyping Call Rate (%) | P-Value <sup>†</sup> | P-Value <sup>‡</sup> |
|----------------------------------------------------------------------|------------|------------|------------------------|-----------------------|----------------------------|-------------|--------------------------|----------------------|----------------------|
| NNMT (con't)                                                         | rs2301128  | 11         | 113673209              | G/A                   | 9.1                        | 0.58        | 99.9                     | 0.96                 | 0.86                 |
|                                                                      | rs2155806  | 11         | 113677720              | T/C                   | 11.6                       | 0.43        | 99.9                     | 0.09                 | 0.08                 |
|                                                                      | rs11214938 | 11         | 113677870              | C/T                   | 5.5                        | 1.00        | 99.9                     | 0.41                 | 0.45                 |
|                                                                      | rs2852447  | 11         | 113684911              | C/T                   | 18.7                       | 0.06        | 99.5                     | 0.25                 | 0.23                 |
|                                                                      | rs10891647 | 11         | 113691855              | T/C                   | 12.8                       | 0.41        | 100.0                    | 0.11                 | 0.09                 |
| Appolipoprotein A-V (APOA5)                                          | rs651821   | 11         | 116167789              | T/C                   | 28.3                       | 0.61        | 100.0                    | 0.38                 | 0.48                 |
| Appolipoprotein A-IV (APOA4)                                         | rs1268354  | 11         | 116195788              | T/C                   | 42.6                       | 0.96        | 100.0                    | 0.68                 | 0.69                 |
|                                                                      | rs2071522  | 11         | 116202748              | C/T                   | 42.5                       | 0.85        | 99.8                     | 0.66                 | 0.65                 |
|                                                                      | rs2071521  | 11         | 116203058              | A/G                   | 42.7                       | 0.92        | 99.9                     | 0.67                 | 0.66                 |
| Appolipoprotein C-III (APOC3)                                        | rs2727789  | 11         | 116202097              | T/G                   | 42.9                       | 0.78        | 99.7                     | 0.68                 | 0.68                 |
|                                                                      | rs2849176  | 11         | 116202131              | C/T                   | 42.6                       | 0.89        | 99.9                     | 0.56                 | 0.55                 |
|                                                                      | rs2542051  | 11         | 116202948              | A/C                   | 42.8                       | 0.81        | 99.8                     | 0.63                 | 0.63                 |
|                                                                      | rs5128     | 11         | 116208850              | C/G                   | 31.8                       | 0.24        | 99.7                     | 0.87                 | 0.77                 |
| Appolipoprotein A-I (APOA1)                                          | rs10750098 | 11         | 116210778              | T/G                   | 32.4                       | 0.15        | 99.7                     | 0.74                 | 0.65                 |
|                                                                      | rs12718462 | 11         | 116210929              | T/C                   | 5.4                        | 0.65        | 99.4                     | 0.12                 | 0.13                 |
|                                                                      | rs632153   | 11         | 116215449              | G/T                   | 7.8                        | 0.05        | 100.0                    | 0.62                 | 0.53                 |
|                                                                      | rs480009   | 11         | 116217184              | G/A                   | 29.9                       | 0.21        | 99.8                     | 0.03                 | 0.02                 |
| Heat shock 70kDa protein 8 (HSPA8)                                   | rs4936770  | 11         | 122434085              | T/C                   | 44.7                       | 0.89        | 99.9                     | 0.13                 | 0.09                 |
| Potassium inwardly-rectifying channel, subfamily J, member 1 (KCNJ1) | rs675759   | 11         | 128213185              | G/C                   | 11.6                       | 0.02        | 100.0                    | 0.24                 | 0.20                 |
|                                                                      | rs1148058  | 11         | 128217991              | C/T                   | 32.1                       | 0.20        | 99.9                     | 0.91                 | 0.93                 |
|                                                                      | rs1148059  | 11         | 128219054              | C/A                   | 32.1                       | 0.22        | 99.8                     | 0.94                 | 0.91                 |
|                                                                      | rs3758766  | 11         | 128221182              | T/C                   | 32.3                       | 0.23        | 99.9                     | 0.91                 | 0.92                 |
|                                                                      | rs17137982 | 11         | 128227400              | G/C                   | 33.3                       | 0.09        | 99.7                     | 0.90                 | 0.73                 |
|                                                                      | rs675482   | 11         | 128231804              | G/A                   | 40.9                       | 0.60        | 99.9                     | 0.68                 | 0.44                 |
|                                                                      | rs673614   | 11         | 128232211              | T/C                   | 40.9                       | 0.92        | 99.7                     | 0.53                 | 0.35                 |
|                                                                      | rs2855798  | 11         | 128238171              | G/T                   | 14.2                       | 0.70        | 99.9                     | 0.86                 | 0.76                 |
|                                                                      | rs11600347 | 11         | 128238524              | C/A                   | 4.5                        | 0.79        | 100.0                    | 0.38                 | 0.51                 |
|                                                                      | rs2855794  | 11         | 128239634              | G/A                   | 15.7                       | 0.66        | 99.6                     | 0.24                 | 0.23                 |
|                                                                      | rs3016774  | 11         | 128240876              | T/C                   | 14.9                       | 0.31        | 98.8                     | 0.68                 | 0.84                 |

\*HW=Hardy-Weinberg

†P-value for the association between SNPs and absolute mean arterial pressure response to potassium intervention

‡P-value for the association between SNPs and percent mean arterial pressure response to potassium intervention
